# Supplementary material for: Air-processed polymer tandem solar cells with power conversion efficiency exceeding 10%
Source: Royal Society of Chemistry journal article supplement (doi:10.1039/c5ee02145f), 2015-01-01
Supplement: c5ee02145f1.pdf [file c5ee02145f1.pdf]

Supporting information for

**Air-processed polymer tandem solar cells with power conversion efficiency exceeding 10%**

Ning Li<sup>1</sup> & Christoph J. Brabec<sup>1,2</sup>

<sup>1</sup> Institute of Materials for Electronics and Energy Technology (i-MEET), Friedrich-Alexander University Erlangen-Nürnberg, Martensstraße 7, 91058 Erlangen, Germany

<sup>2</sup> Bavarian Center for Applied Energy Research (ZAE Bayern), Haberstraße 2a, 91058 Erlangen, Germany

\*Correspondence should be addressed to Ning Li. Email: [Ning.Li@fau.de](mailto:Ning.Li@fau.de); Tel.: +49 (0)9131 - 8527634; Fax: +49 (0)9131 - 8528495.

Keywords: ((Organic photovoltaics; Organic tandem solar cells; PTB7-Th, PBDTTT-EFT or PCE10; Solvent treatment; Air-processing))

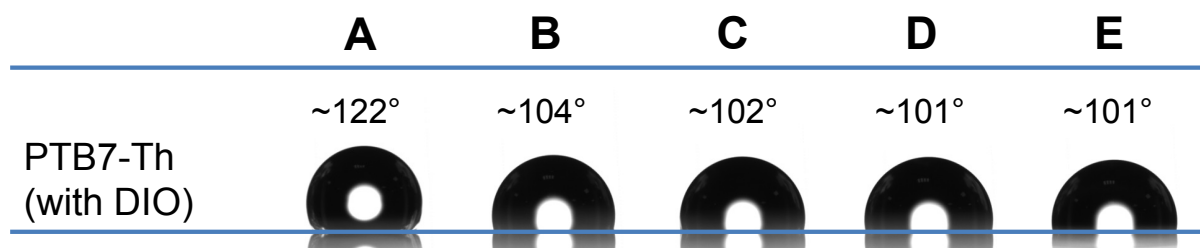

**Figure S1** Contact angles of water droplets on PTB7-Th. **A:** as printed; **B:** annealed at 140°C for 5 min after deposition; **C:** annealed at 140°C for 10 min after deposition; **D:** dried in air over 24 h after deposition; **E:** treated with methanol after deposition.

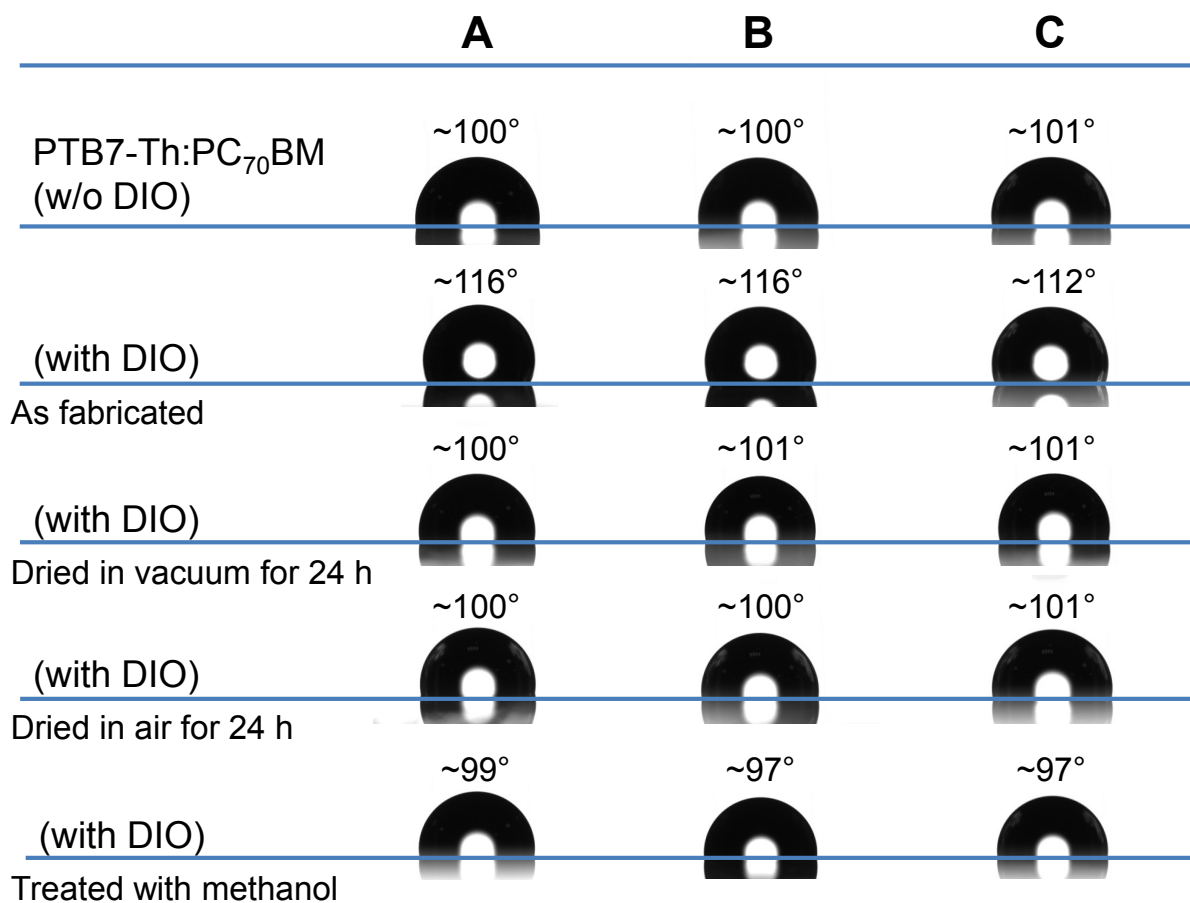

**Figure S2** Contact angles of water droplets on PTB7-Th:PC<sub>70</sub>BM. The samples with and without DIO were treated with different methods. **A:** spin-coated in nitrogen; **B:** spin-coated in air; **C:** doctor-bladed in air.

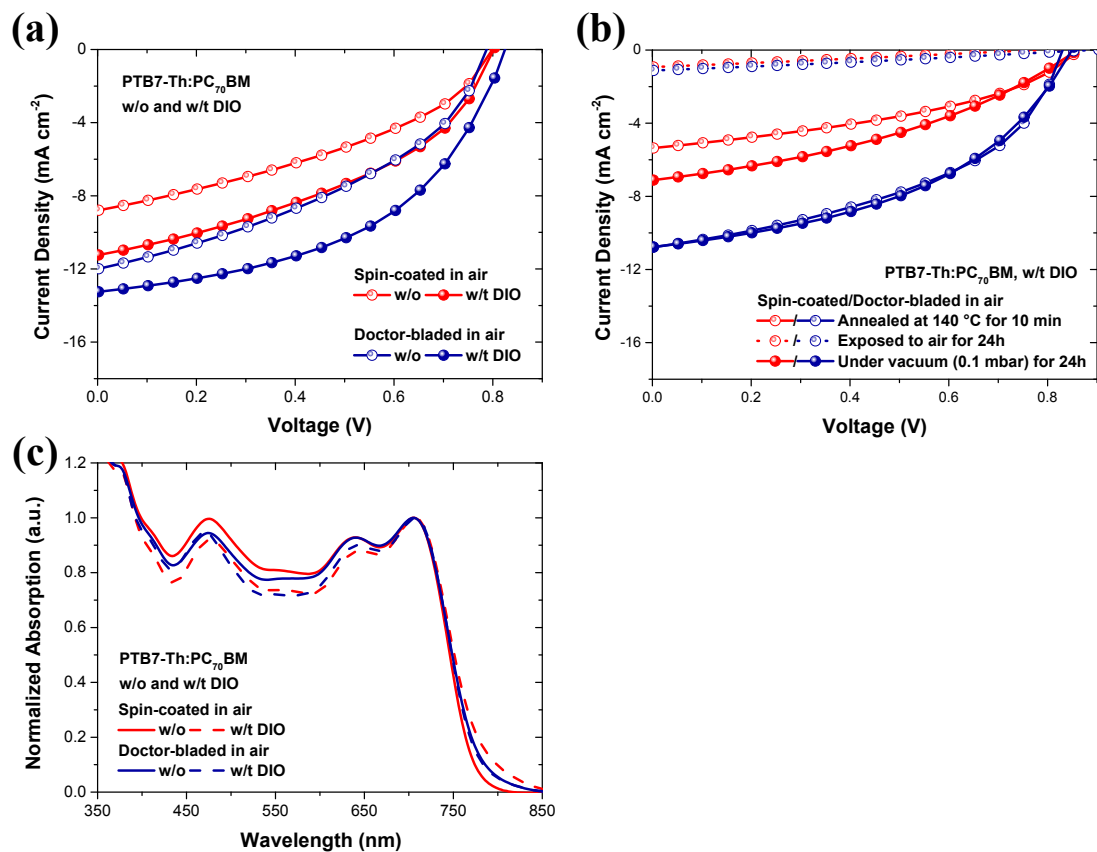

**Figure S3** (a) and (b) J-V characteristics of air-processed PTB7-Th:PC<sub>70</sub>BM solar cells in a regular architecture with various treatments. (c) Absorption spectra of air-processed PTB7-Th:PC<sub>70</sub>BM films with and without Dio.

**Table S1** Photovoltaic parameters of the air-processed PTB7-Th:PC<sub>70</sub>BM solar cells in a regular architecture with various treatments.

| Device               | Dio | Treatment after deposition of the active layer | $V_{OC}$ [V] | $J_{SC}$ [mA cm <sup>-2</sup> ] | FF [%] | PCE [%] | $R_p$ [kΩ cm <sup>2</sup> ] | $R_s$ [Ω cm <sup>2</sup> ] |
|----------------------|-----|------------------------------------------------|--------------|---------------------------------|--------|---------|-----------------------------|----------------------------|
| Spin-coated in Air   | w/o | -                                              | 0.80         | 8.79                            | 38.2   | 2.69    | 1640.2                      | 2.66                       |
|                      | w/t | -                                              | 0.80         | 11.23                           | 41.3   | 3.71    | 1692.7                      | 2.71                       |
|                      |     | 140°C, 10 min                                  | 0.86         | 5.36                            | 40.3   | 1.86    | 1647.6                      | 6.11                       |
|                      |     | Exposed to air, 24h                            | 0.79         | 0.93                            | 25.9   | 0.19    | -                           | -                          |
|                      |     | 0.1 mbar, 24h                                  | 0.86         | 7.11                            | 37.0   | 2.26    | 1783.8                      | 25.71                      |
| Doctor-bladed in Air | w/o | -                                              | 0.79         | 11.99                           | 39.7   | 3.76    | 2046.1                      | 2.37                       |
|                      | w/t | -                                              | 0.82         | 13.25                           | 48.8   | 5.30    | 2601.2                      | 3.35                       |
|                      |     | 140°C, 10 min                                  | 0.83         | 10.78                           | 45.1   | 4.04    | 2098.6                      | 3.17                       |
|                      |     | Exposed to air, 24h                            | 0.89         | 1.12                            | 24.4   | 0.24    | -                           | -                          |
|                      |     | 0.1 mbar, 24h                                  | 0.85         | 10.77                           | 44.8   | 4.10    | 2380.8                      | 7.78                       |

(a)

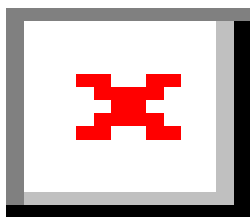

(b)

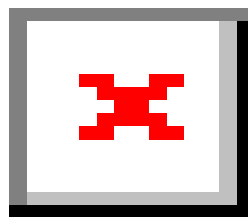

(c)

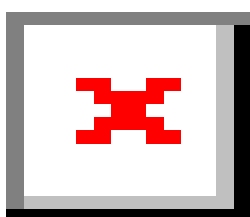

(d)

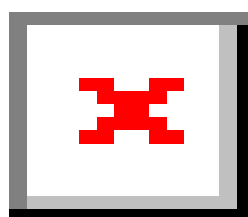

**Figure S4** optical microscopy images of (a) PTB7-Th dried in vacuum. (b) PTB7-Th treated with methanol. (c) PTB7-Th:PC<sub>70</sub>BM dried in vacuum. (d) PTB7-Th:PC<sub>70</sub>BM treated with methanol. The thin films with 3% DIO were deposited by doctor-blading in air on glass substrates. Scale bar: 50  $\mu\text{m}$ .

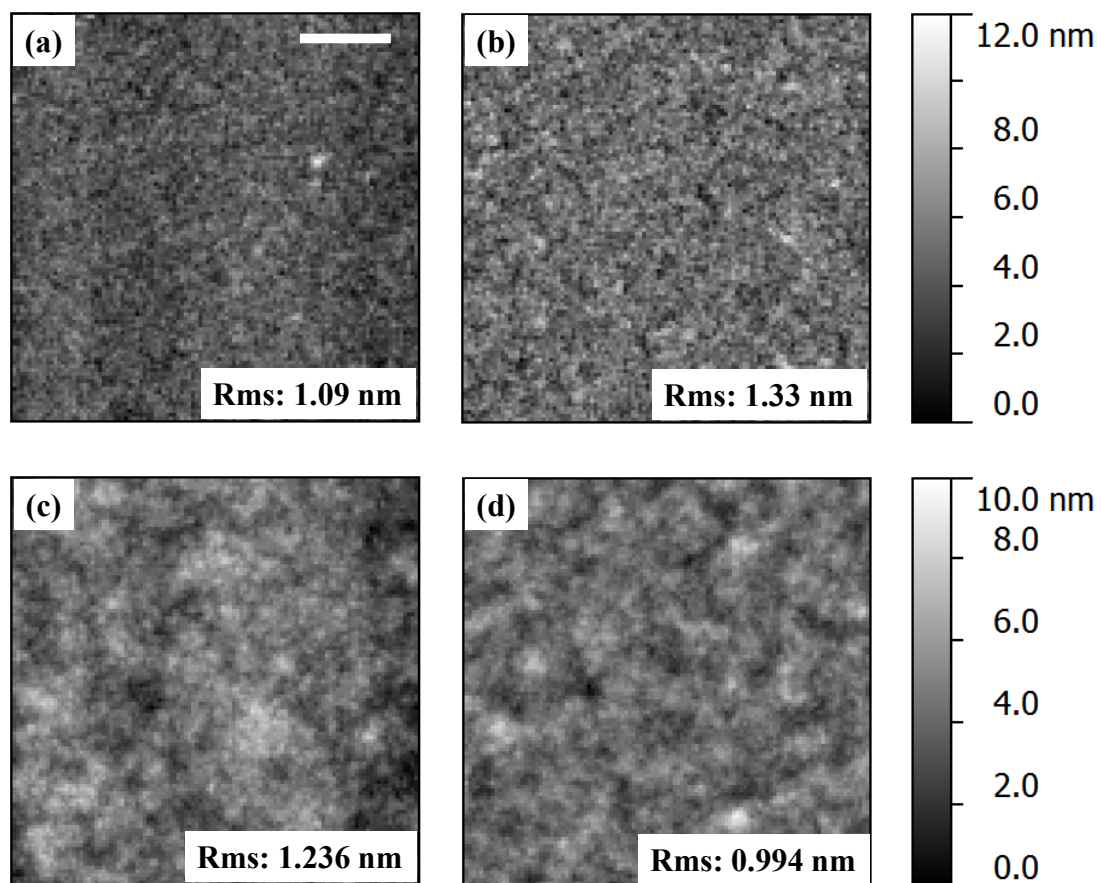

**Figure S5** AFM images of (a) PTB7-Th dried in vacuum. (b) PTB7-Th treated with methanol. (c) PTB7-Th:PC<sub>70</sub>BM dried in vacuum. (d) PTB7-Th:PC<sub>70</sub>BM treated with methanol. The thin films with 3% DIO were deposited by doctor-blading in air on glass substrates. Scale bar: 1 μm.

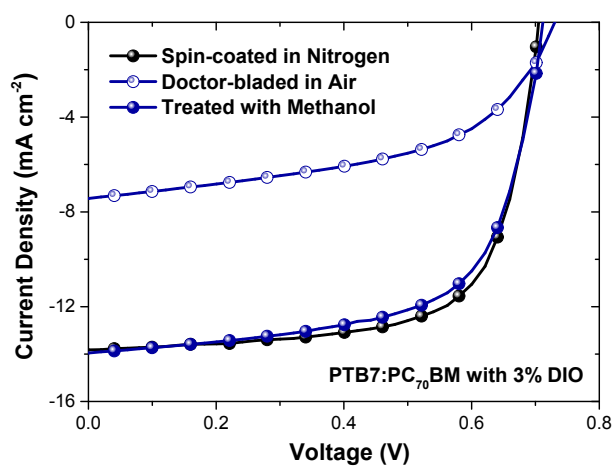

**Figure S6** J-V characteristics of PTB7:PC<sub>70</sub>BM single cells fabricated under different conditions.

**Table S2** Photovoltaic parameters of PTB7:PC<sub>70</sub>BM solar cells fabricated under different conditions.

| Device                        | Treatment | $V_{OC}$<br>[V] | $J_{SC}$<br>[mA cm <sup>-2</sup> ] | FF<br>[%] | PCE<br>[%] |
|-------------------------------|-----------|-----------------|------------------------------------|-----------|------------|
| Spin-coated in N <sub>2</sub> | -         | 0.70            | 13.87                              | 68.9      | 6.69       |
| Doctor-bladed in Air          | -         | 0.73            | 7.43                               | 51.9      | 2.82       |
|                               | Methanol  | 0.71            | 13.95                              | 64.5      | 6.38       |

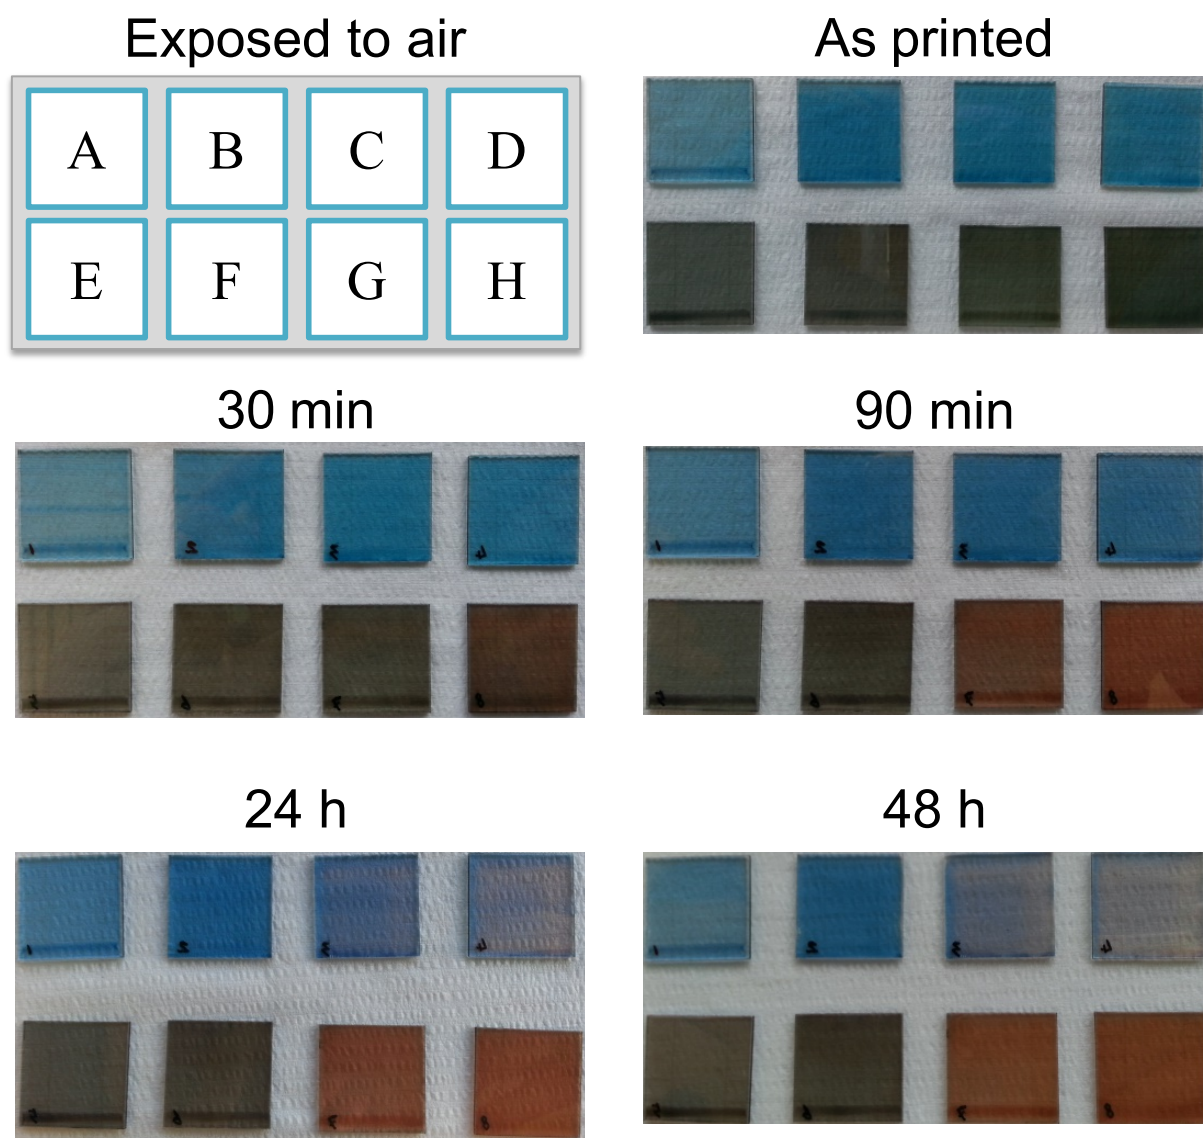

**Figure S7** Environmental stability of PTB7-Th and PTB7-Th:PC<sub>70</sub>BM thin films. PTB7-Th (A-D) and PTB7-Th:PC<sub>70</sub>BM (E-H) were doctor-bladed in air on ITO-coated glasses. The samples were exposed to air after deposition with and without methanol treatment. A and E: without DIO; B and F: with DIO, treated with methanol; C and G: with DIO, no treatment; D and H: with DIO, samples were coated on top of PEDOT:PSS.
